# Supplementary material for: The Role of Peroxisome Proliferator-Activated Receptors (PPARs) in Pan-Cancer
Source: Hindawi journal article supplement (doi:10.1155/2020/6527564), 2020-09-22
Supplement: f1 [file 6527564.f1.pdf]

## Supplementary Materials

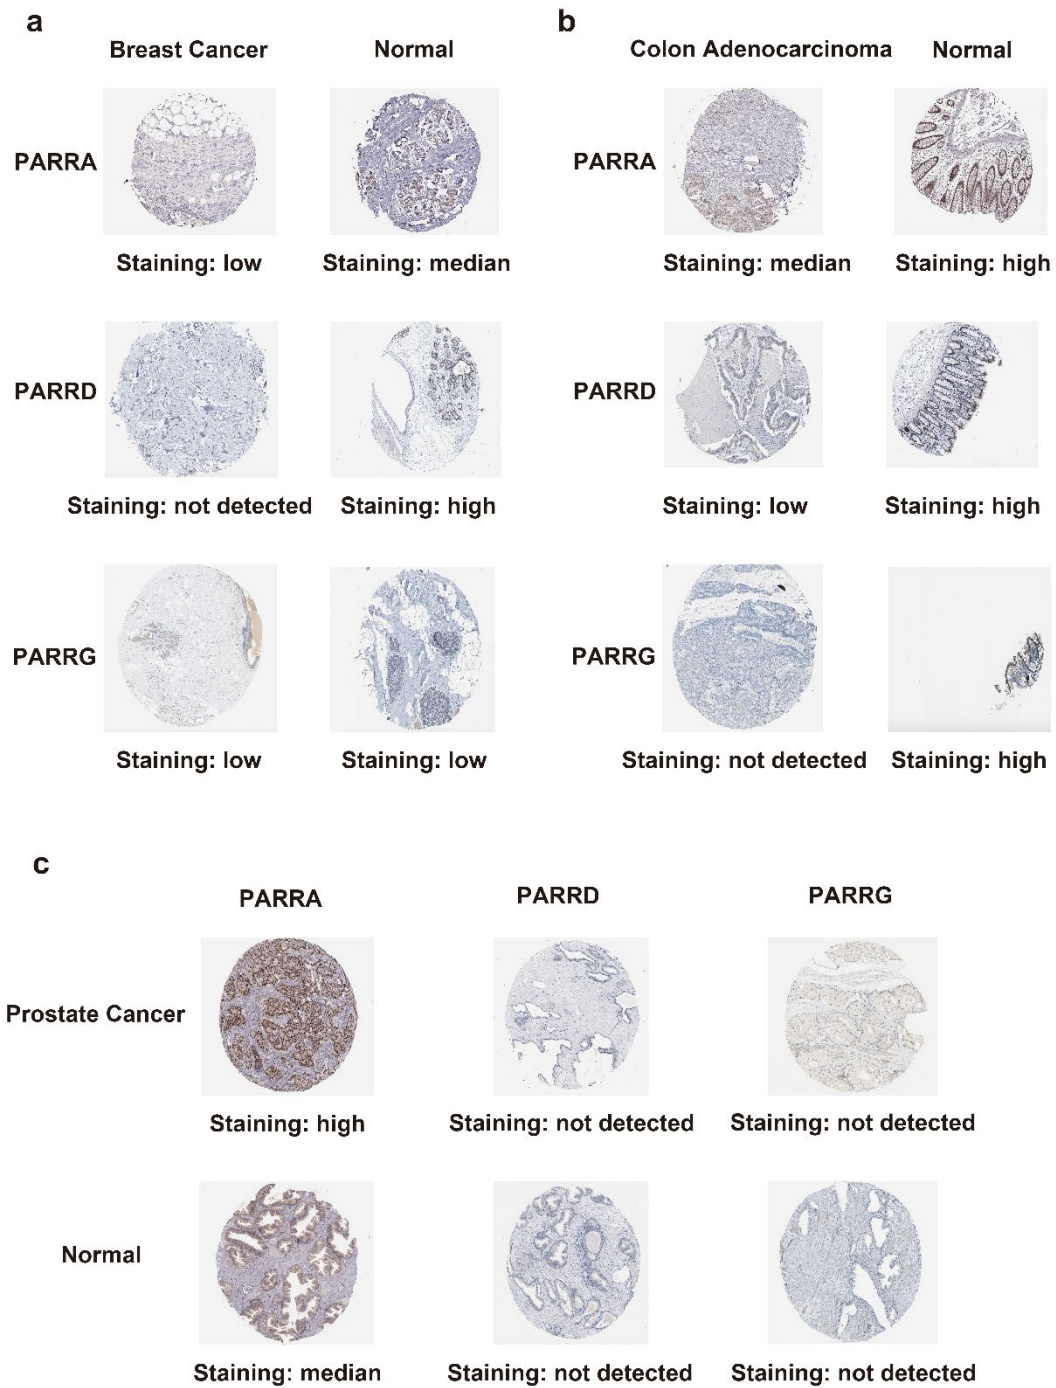

Figure S1 PPAR protein expression in cancer (breast cancer, colon adenocarcinoma and prostate cancer) and normal tissues from the human protein atlas database

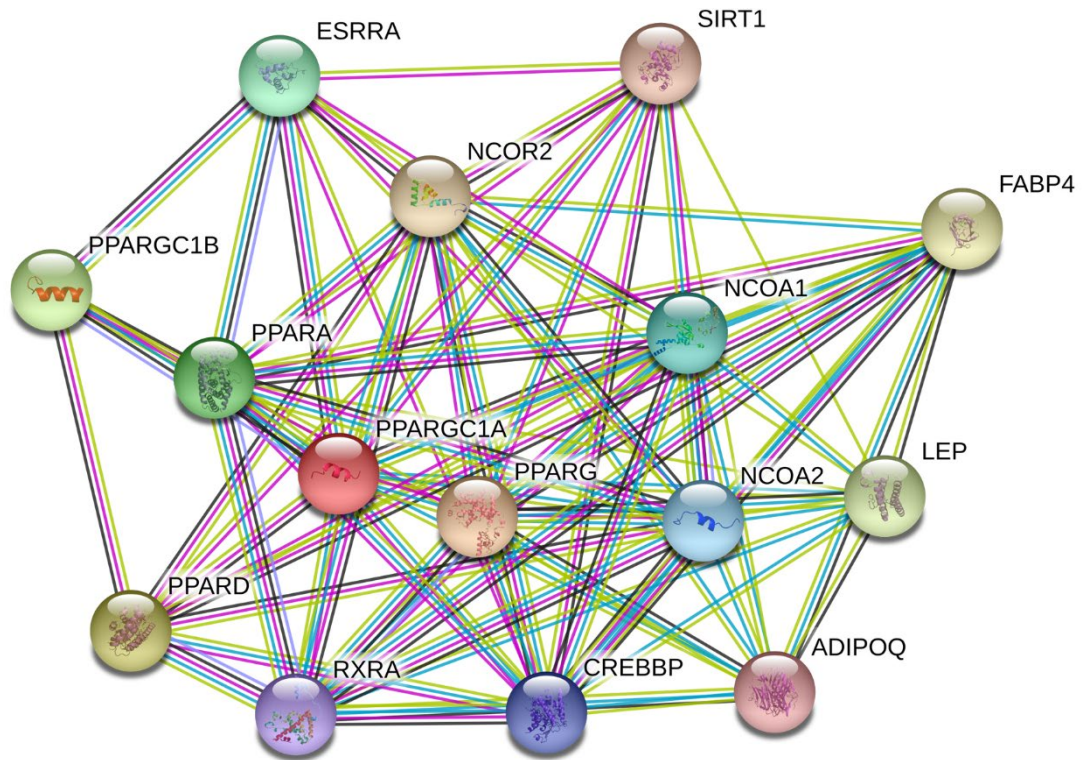

Figure S2 The protein-protein interaction (PPI) network constructed among PPARA, PPARD, PPARG, PPARGC1A, PPARGC1B and their top related genes.
